# Supplementary material for: The crucial role of self-assembly in nonlinear optical properties of polymeric composites based on crown-substituted ruthenium phthalocyaninate
Source: Royal Society of Chemistry journal article supplement (doi:10.1039/c5tc00965k), 2015-01-01
Supplement: c5tc00965k1.pdf [file c5tc00965k1.pdf]

## Supporting Information

### The Crucial Role of Self-assembling in Nonlinear Optical Properties of Polymeric Composites Based on Crown-substituted Ruthenium Phthalocyaninate

*Yulia G. Gorbunova<sup>a,b\*</sup>, Antonina D. Grishina<sup>a</sup>, Alexander G. Martynov<sup>a</sup>, Tatiyana V. Krivenko<sup>a</sup>, Alexandra A. Isakova<sup>a</sup>, Vladimir V. Savel'ev<sup>a</sup>, Sergey E. Nefedov<sup>b</sup>, Eugeny V. Abkhalimov<sup>a</sup>, Anatoly V. Vannikov<sup>a</sup>, Aslan Yu. Tsivadze<sup>a,b</sup>*

<sup>a</sup> *Frumkin Institute of Physical Chemistry and Electrochemistry, Russian Academy of Sciences, Leninskiy Pr. 31, Moscow, 119071, Russia*

<sup>b</sup> *Kurnakov Institute of General and Inorganic Chemistry, Russian Academy of Sciences, Leninskiy Pr. 31, Moscow, 119991, Russia*

e-mail: [yulia@igic.ras.ru](mailto:yulia@igic.ras.ru)

|                                                                                                                                                                                                                                              | Page |
|----------------------------------------------------------------------------------------------------------------------------------------------------------------------------------------------------------------------------------------------|------|
| <b>Figure S1.</b> A scheme of the Z-scan measurement technique: (1) pulse laser, (2) focusing lens, (3) sample moved along the beam direction from $-z$ to $+z$ range, (4) aperture with a 0.1 cm hole in the center, and (5) photodetector. | 2    |
| <b>Figure S2.</b> Molecular structure of complex (1), (30% probability ellipsoids). Hydrogen atoms are omitted for clarity.                                                                                                                  | 3    |
| <b>Figure S3.</b> Crystal packing of complex (1). Hydrogen atoms and solvate molecules are omitted for clarity.                                                                                                                              | 4    |
| <b>Figure S4.</b> HR ESI-MS spectrum of complex (1).                                                                                                                                                                                         | 5    |

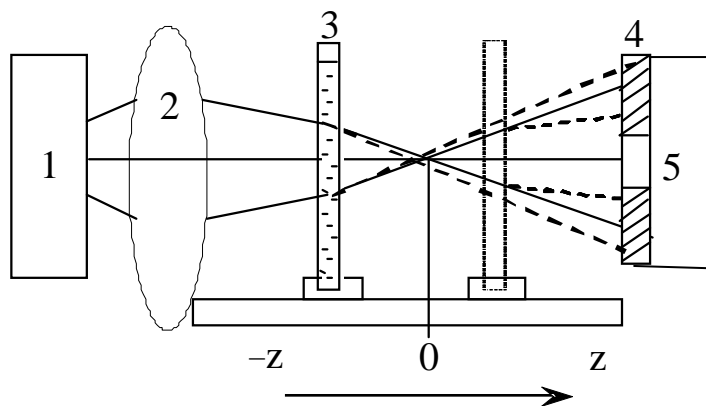

**Figure S1.** A scheme of the Z-scan measurement technique: (1) pulse laser, (2) focusing lens, (3) sample moved along the beam direction from  $-z$  to  $+z$  range, (4) aperture with a 0.1 cm hole in the center, and (5) photodetector.

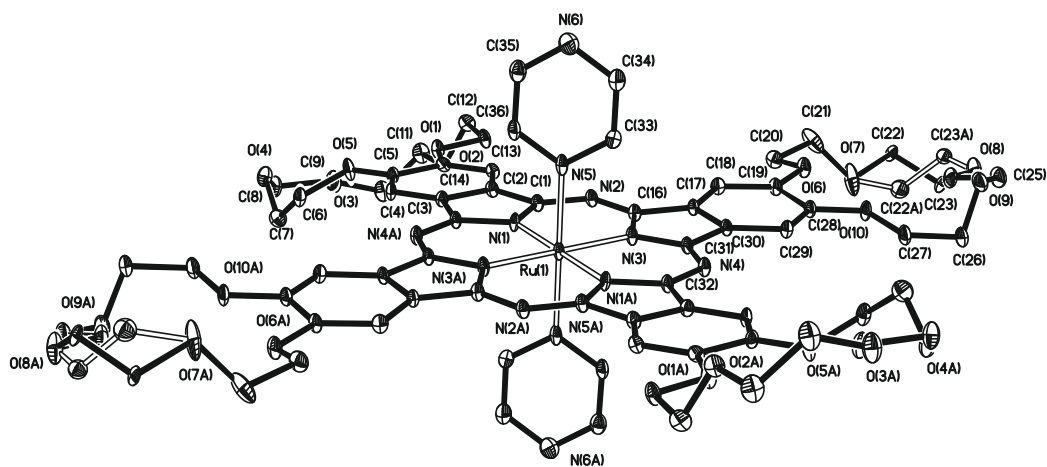

**Figure S2.** Molecular structure of complex (1), (30% probability ellipsoids). Hydrogen atoms are omitted for clarity.

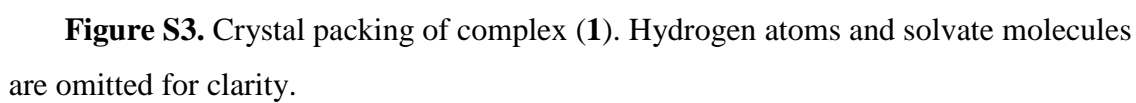

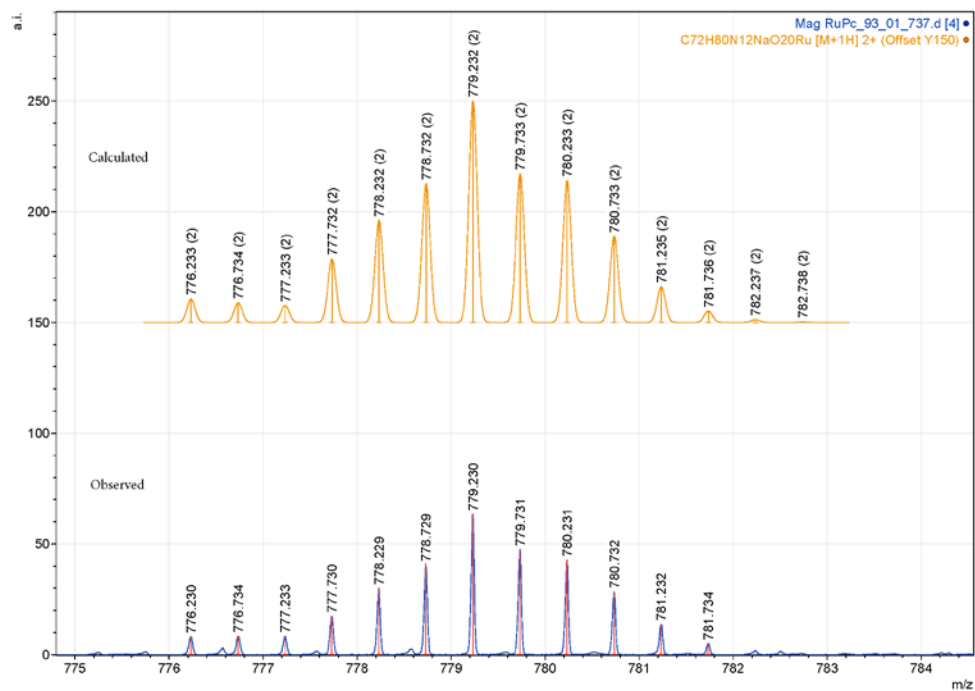

**Figure S4.** HR ESI-MS spectrum of complex (1).
